# Supplementary material for: Safe-by-Design Antibacterial Peroxide-Substituted Biomimetic Apatites: Proof of Concept in Tropical Dentistry
Source: MDPI journal article supplement (doi:10.3390/jfb13030144), 2022-09-07
Supplement: s1 [file s1]

## Supporting Information

**Figure S1:** XRD patterns for apatite compounds prepared under varying conditions in terms of (top graph)  $\text{H}_2\text{O}_2$  initial amounts in the precipitating medium and (bottom graph) apatite maturation times. The reference names refer to **Table 1** form the main text.

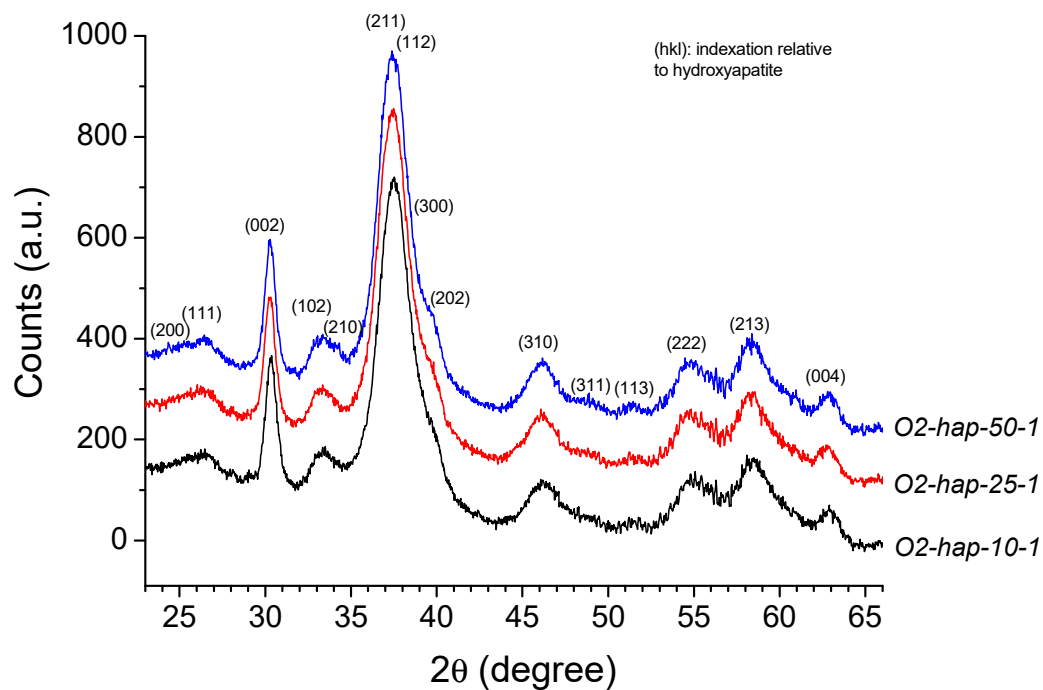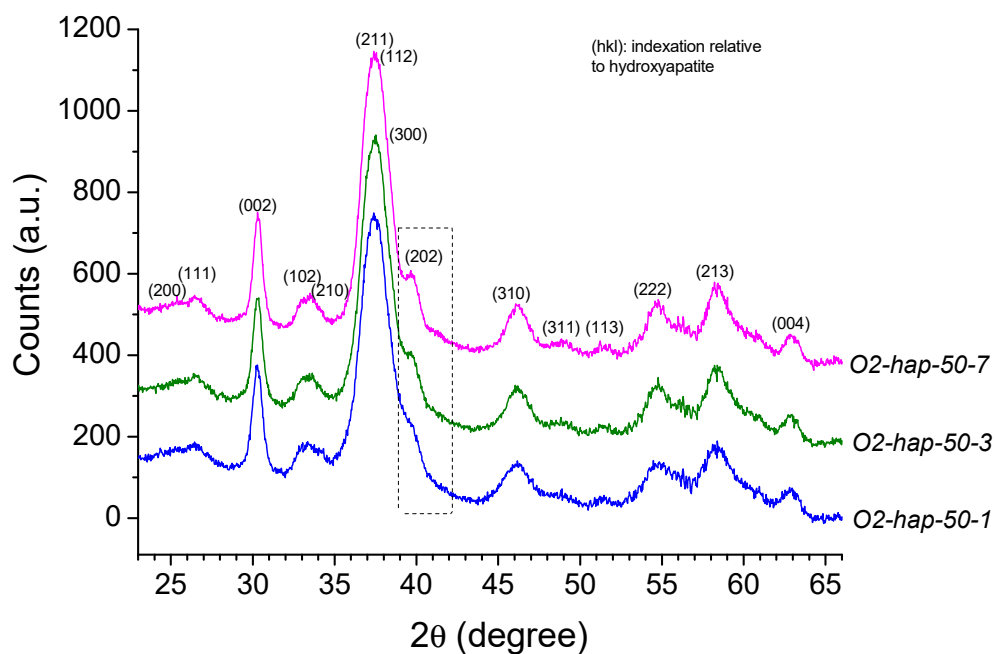

**Figure S2:** FTIR spectra for apatite compounds prepared under increasing initial amounts of  $\text{H}_2\text{O}_2$  for an apatite maturation time of 1 day. The second graph is a zoomed view on the  $425\text{--}1500\text{ cm}^{-1}$  domain. The main phosphate band attributions have been added, with reference to bone-like apatite.

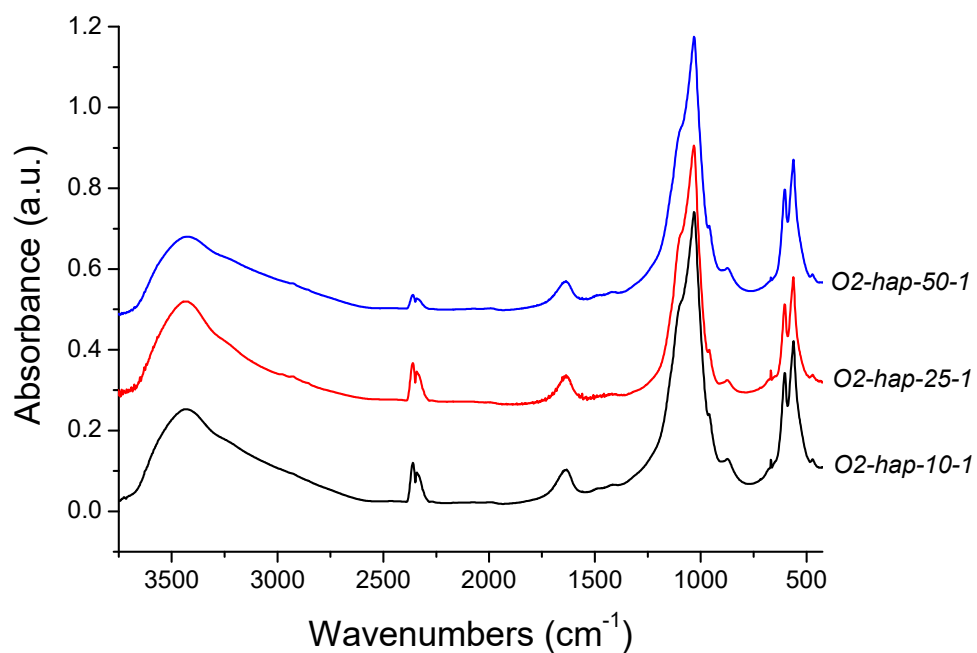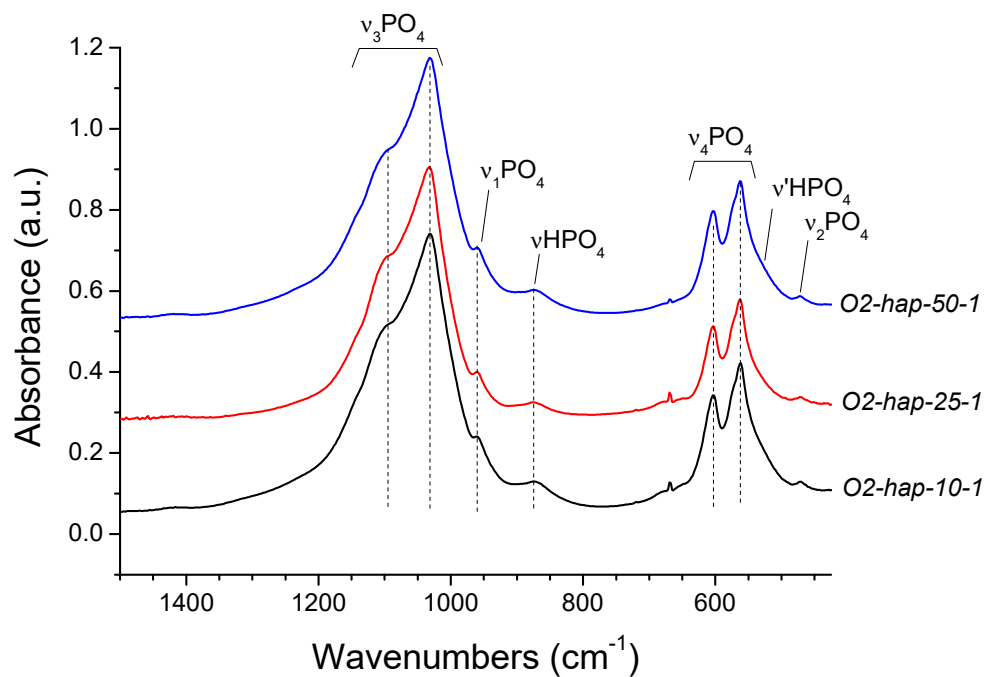

**Figure S3:** Replicated results (quadruplicate) of antibacterial tests with *P. gingivalis* (Pg), *A. actinomycetemcomitans* (Aa), *F. nucleatum* (Fn) and *S. aureus* (Sa) for all 4 types of apatite samples: Ag-hap (A), O2-doped (B), Ag-O2-hap (C) and hap (D).

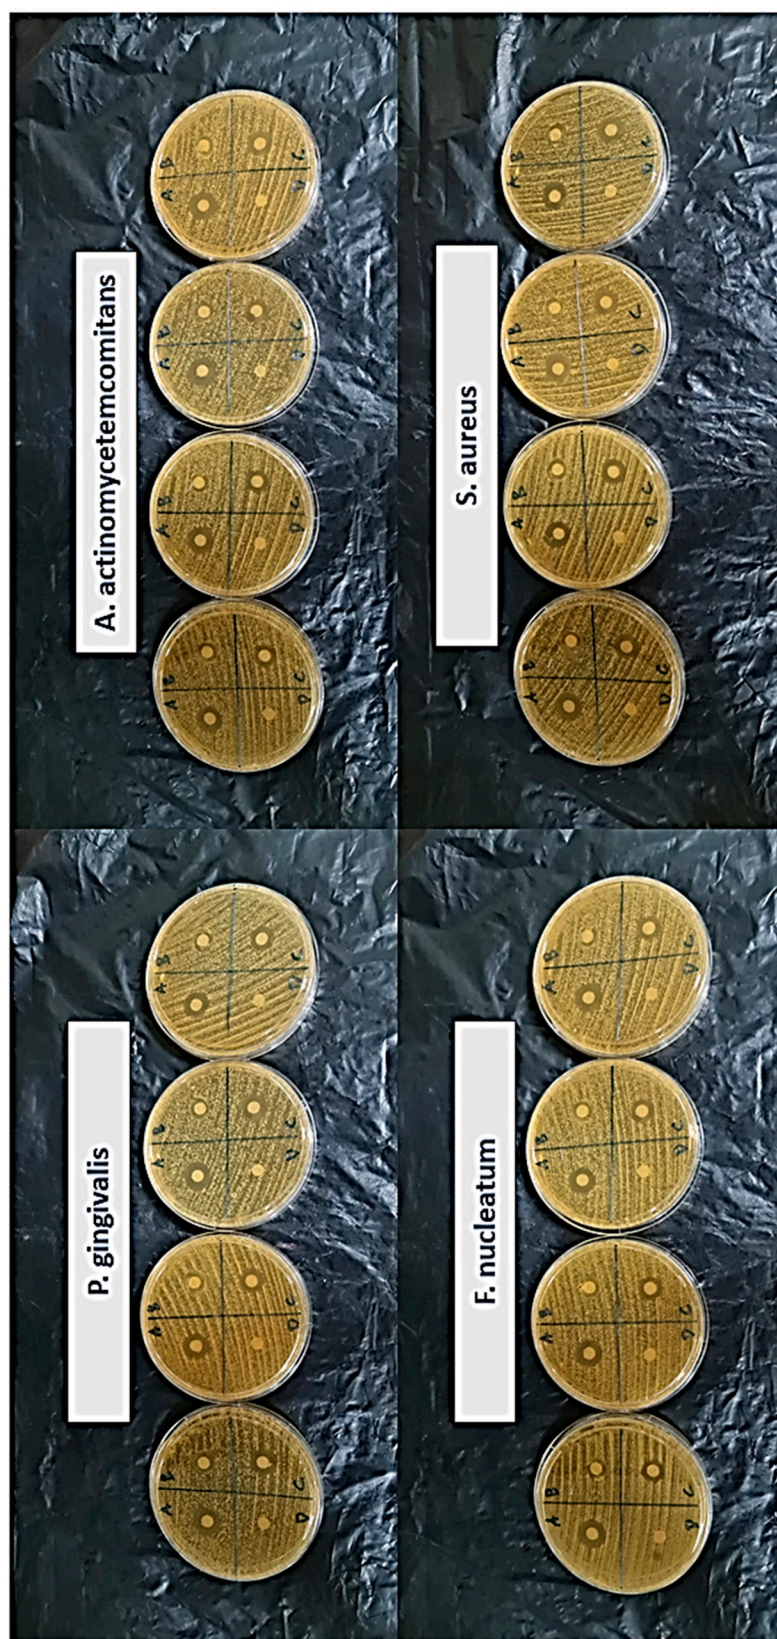

**Figure S4:** SEM (a) and EDX (b) analyses of the 4 types of apatite starting powders, in secondary electron (SE) and backscattered electron (BSE) modes. Initial magnification of x1000.

(a)

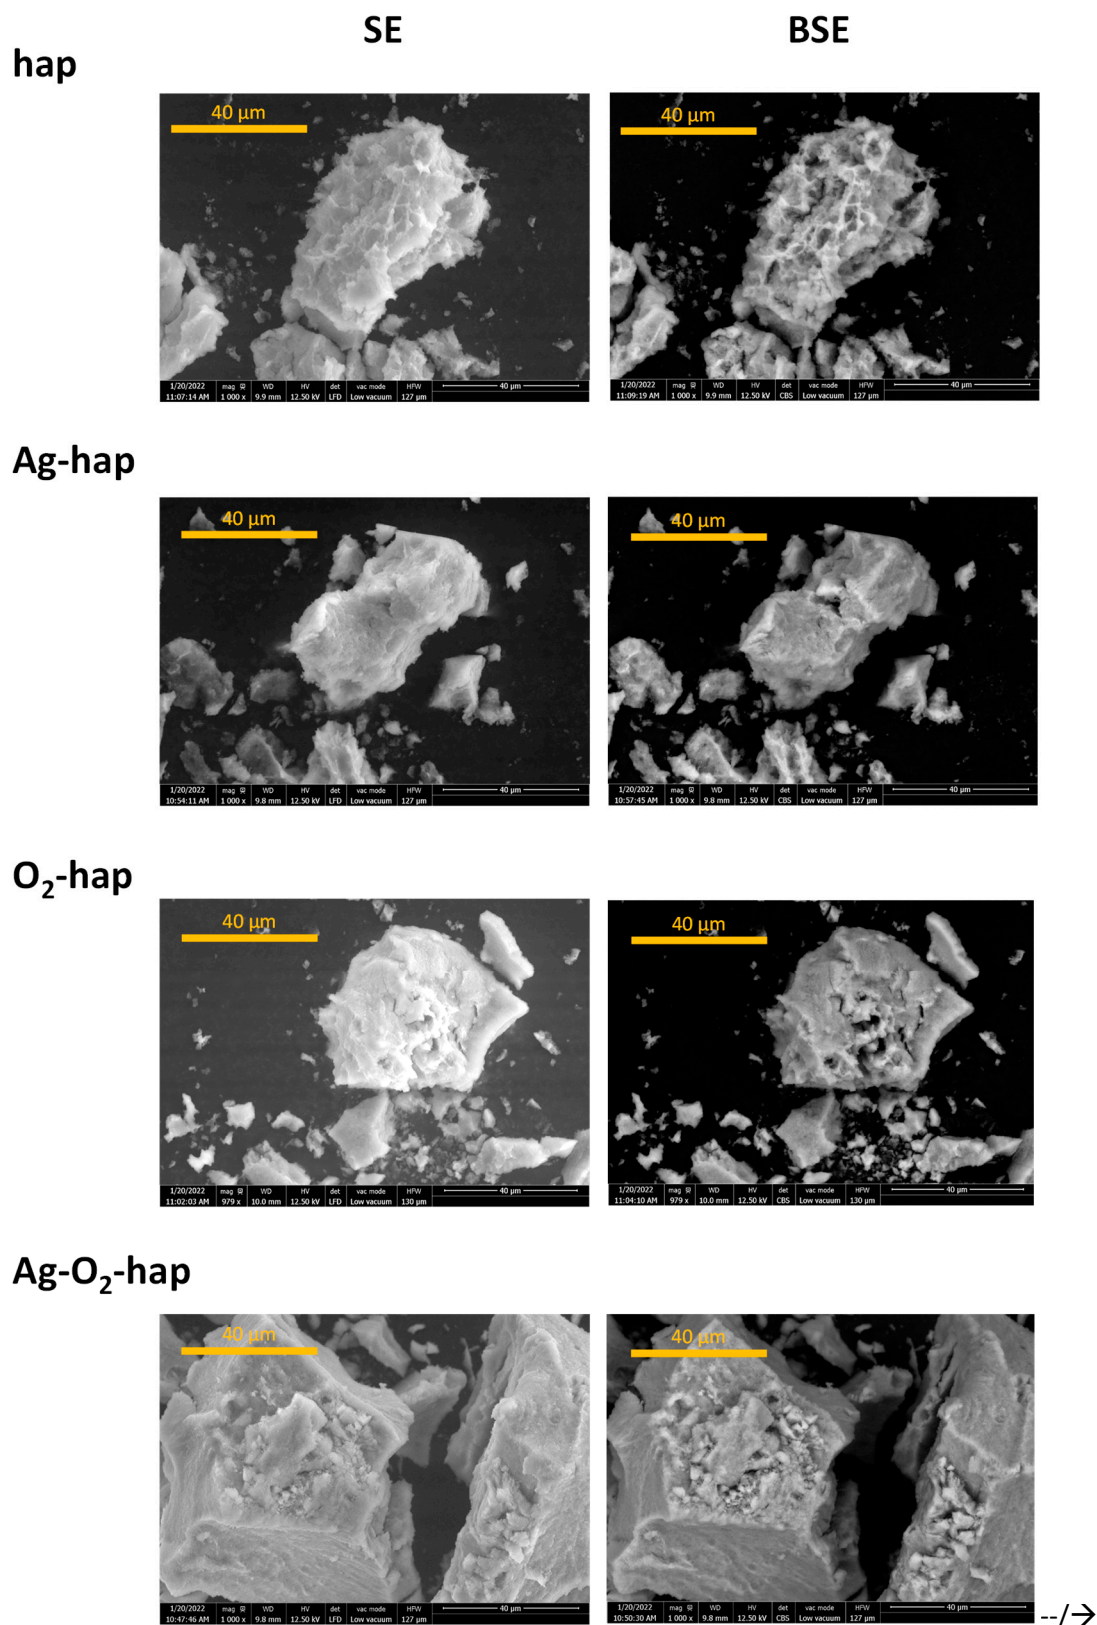



(b)

hap

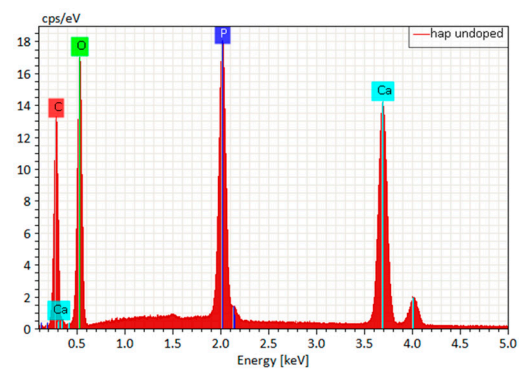

Ag-hap

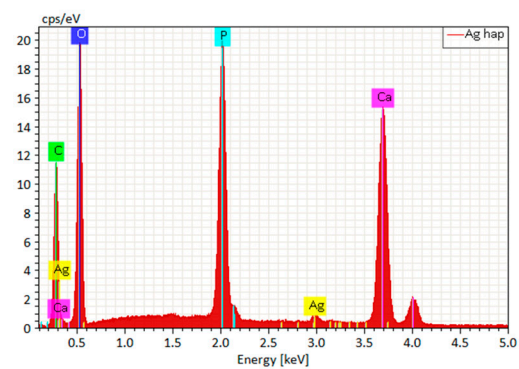

O<sub>2</sub>-hap

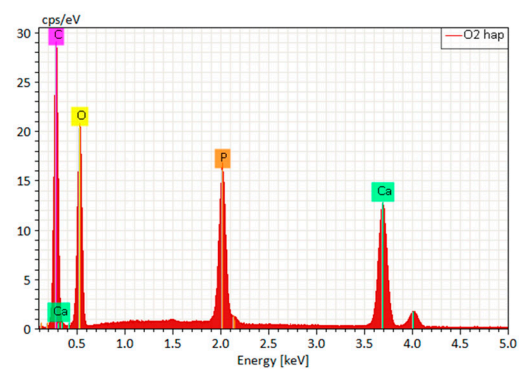

Ag-O<sub>2</sub>-hap

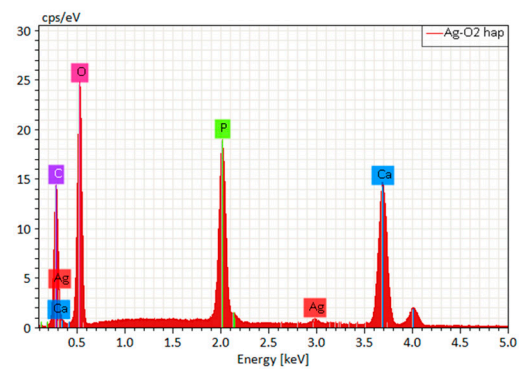

**Figure S5:** Visualization of the interconnected porous network (green) obtained thanks to the analysis of  $\mu$ CT results (Vg Studio Max software)

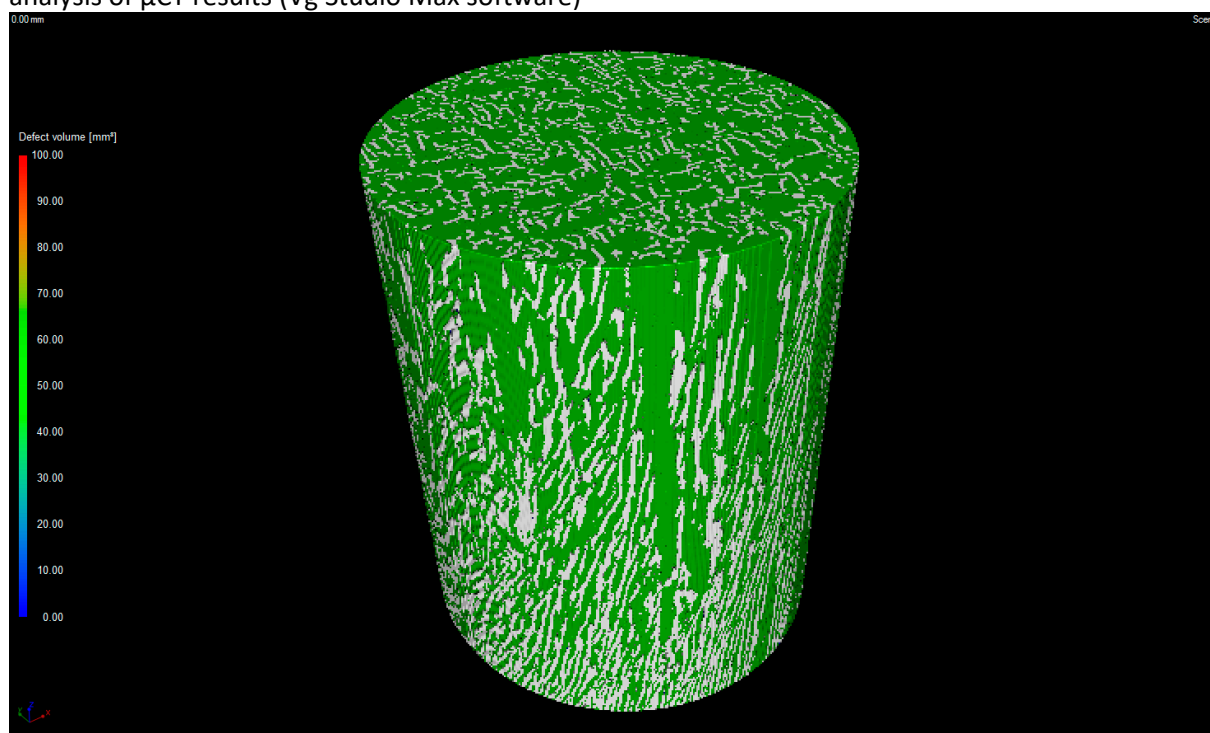

**Table S1:** Results of bacterial growth inhibition of the 4 types of hap (ref) and doped hap.

| Types of Apatite           | <i>Porphyromonas gingivalis</i> | <i>Aggregatibacter actinomycetemcomitans</i> | <i>Fusobacterium nucleatum</i> | <i>Staphylococcus aureus</i> |
|----------------------------|---------------------------------|----------------------------------------------|--------------------------------|------------------------------|
| Ag-hap (A)                 | 12.900±0.53                     | 12.875±0.17                                  | 11.950±0.11                    | 14.875±0.38                  |
| O <sub>2</sub> -hap (B)    | 8.833±0.19                      | 8.125±0.12                                   | 7.650±0.12                     | 9.100±0.25                   |
| Ag-O <sub>2</sub> -hap (C) | 11.050±0.30                     | 10.437±0.26                                  | 9.575±0.44                     | 12.675±0.12                  |
| hap (D)                    | 0.000                           | 0.000                                        | 0.000                          | 0.000                        |

**Table S2:** Summary of one-way ANOVA on the antimicrobial properties of the samples against *P. gingivalis*.

| Sample                 | Mean    | Std Deviation | Std. Error | <i>p</i> |
|------------------------|---------|---------------|------------|----------|
| Ag-hap                 | 12.9000 | 0.5292        | 0.2646     | 0.001*   |
| O <sub>2</sub> -hap    | 8.3250  | 0.1848        | 0.0924     |          |
| Ag-O <sub>2</sub> -hap | 11.0500 | 0.3000        | 0.1500     |          |

\*Significance  $p < 0.05$

**Table S3:** Summary of one-way ANOVA on the antimicrobial properties of the samples against *A. actinomycetemcomitans*.

| Sample                 | Mean    | Std Deviation | Std. Error | <i>p</i> |
|------------------------|---------|---------------|------------|----------|
| Ag-hap                 | 12.8250 | 0.1658        | 0.0829     | 0.001*   |
| O <sub>2</sub> -hap    | 8.1250  | 0.1190        | 0.0595     |          |
| Ag-O <sub>2</sub> -hap | 10.4375 | 0.2562        | 0.1281     |          |

\*Significance  $p < 0.05$

**Table S4:** Summary of one-way ANOVA on the antimicrobial properties of the samples against *F. nucleatum*.

| Sample                 | Mean    | Std Deviation | Std. Error | <i>p</i> |
|------------------------|---------|---------------|------------|----------|
| Ag-hap                 | 11.9500 | 0.1080        | 0.0540     | 0.001*   |
| O <sub>2</sub> -hap    | 7.6500  | 0.1915        | 0.0957     |          |
| Ag-O <sub>2</sub> -hap | 9.5750  | 0.4406        | 0.2203     |          |

\*Significance  $p < 0.05$

**Table S5:** Summary of one-way ANOVA on the antimicrobial properties of the samples against *S. aureus*.

| Sample                 | Mean    | Std Deviation | Std. Error | <i>p</i> |
|------------------------|---------|---------------|------------|----------|
| Ag-hap                 | 14.1875 | 0.3750        | 0.1875     | 0.001*   |
| O <sub>2</sub> -hap    | 9.1000  | 0.2483        | 0.1242     |          |
| Ag-O <sub>2</sub> -hap | 12.6750 | 0.1190        | 0.0595     |          |

\*Significance  $p < 0.05$

**Table S6:** Summary of one-way ANOVA on the protein adsorption.

| Sample                 | Mean     | Std Deviation | Std. Error | <i>p</i> |
|------------------------|----------|---------------|------------|----------|
| Ag-hap                 | 0.9197   | 0.0625        | 0.0361     | 0.001*   |
| O <sub>2</sub> -hap    | 0.4797   | 0.1333        | 0.0770     |          |
| Ag-O <sub>2</sub> -hap | 0.2570   | 0.0702        | 0.0405     |          |
| hap                    | 0.593781 | 0.19631483    | 0.113342   |          |

\*Significance  $p < 0.05$

**Table S7:** Summary of one-way ANOVA on MC3T3E1 osteoblast cell adhesion.

| Sample                 | Mean     | Std Deviation | Std. Error | <i>p</i> |
|------------------------|----------|---------------|------------|----------|
| Ag-hap                 | 99.3233  | 3.4900        | 2.0150     | 0.001*   |
| O <sub>2</sub> -hap    | 105.6233 | 5.2594        | 3.0365     |          |
| Ag-O <sub>2</sub> -hap | 65.7533  | 1.0001        | 0.5774     |          |
| hap                    | 72.7966  | 5.5524        | 3.2057     |          |

\*significance  $p < 0.05$
